## RESEARCH ARTICLE

## Early evidence for beer drinking in a 9000-year-old platform mound in southern China

Jiajing Wang<sup>1†\*</sup>, Leping Jiang<sup>2\*</sup>, Hanlong Sun<sup>2</sup>**1** Stanford Archaeology Center, Stanford University, Stanford, California, United States of America,**2** Zhejiang Provincial Institute of Cultural Relics and Archaeology, Hangzhou, People's Republic of China

† Current address: Department of Anthropology, Dartmouth College, Hanover, New Hampshire, United States of America

\* [Jiajing.Wang@Dartmouth.edu](mailto:Jiajing.Wang@Dartmouth.edu) (JW); [jianglp@hotmail.com](mailto:jianglp@hotmail.com) (LJ)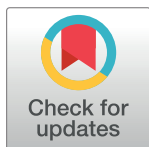

## OPEN ACCESS

**Citation:** Wang J, Jiang L, Sun H (2021) Early evidence for beer drinking in a 9000-year-old platform mound in southern China. PLoS ONE 16(8): e0255833. <https://doi.org/10.1371/journal.pone.0255833>

**Editor:** Peter F. Biehl, University at Buffalo - The State University of New York, UNITED STATES

**Received:** February 28, 2021

**Accepted:** July 24, 2021

**Published:** August 12, 2021

**Copyright:** © 2021 Wang et al. This is an open access article distributed under the terms of the [Creative Commons Attribution License](https://creativecommons.org/licenses/by/4.0/), which permits unrestricted use, distribution, and reproduction in any medium, provided the original author and source are credited.

**Data Availability Statement:** All relevant data are within the manuscript and its [Supporting Information](#) files.

**Funding:** J.W. received funding from the Wenner-Gren Foundation (Grant # 9635) for this research. The funder's website is <http://www.wennergren.org/>. The funding agency did not play any role in the study design, data collection and analysis, decision to publish, or preparation of the manuscript.

**Competing interests:** No authors have competing interests.

## Abstract

Alcoholic beverages played an essential role in rituals in ancient societies. Here we report the first evidence for beer drinking in the context of burial ritual in early Holocene southern China. Recent archaeological investigations at Qiaotou (9,000–8,700 cal. BP) have revealed a platform mound containing human burials and high concentrations of painted pottery, encircled by a human-made ditch. By applying microfossil (starch, phytolith, and fungi) residue analysis on the pottery vessels, we found that some of the pots held beer made of rice (*Oryza* sp.), Job's tears (*Coix lacryma-jobi*), and USOs. We also discovered the earliest evidence for using mold saccharification-fermentation starter in beer making, predating written records by 8,000 years. The beer at Qiaotou was likely served in rituals to commemorate the burial of the dead. Ritualized drinking probably played an integrative role in maintaining social relationships, paving the way for the rise of complex farming societies four millennia later.

## Introduction

Alcohol is the most widely used psychoactive agent in the world [1]. Human societies have been deeply invested in the production, consumption, and distribution of alcoholic beverages for thousands of years [2]. In Ancient Egypt, beer production was an effective mechanism that transformed agricultural produce into a value-added medium for payment and rewards, facilitating the rise of social inequalities [3]. In the Near East, ritualized feasts involving fermented beverages helped maintain social and ideological cohesion among hunter-gatherers [4–6], possibly operating as a driving force behind the initial cereal domestication [7,8]. In the Andes, *chicha* production defined social relations, structured the rhythms of agricultural activities, and provided a basis for legitimizing ruling elites [9,10]. While much research has been done to characterize the social, political, and economic roles of alcohol in ancient societies, little is known about prehistoric China, a region with a long history of alcohol production [11,12]. Previous research in this region has focused on identifying alcohol residues from the archaeological record [12,13]. The social context of alcohol consumption, however, remains understudied.

Here, we present the first evidence for beer drinking in the context of burial ritual in early Holocene southern China. Recent archaeological investigations at Qiaotou (9,000–8,700 cal. BP), a Shangshan culture site, have revealed a platform mound containing human burials, architectural remnants, fire traces, and high concentrations of painted pottery. By applying microfossil (starch, phytolith, and fungi) residue analysis to the pottery remains, we show that some of the vessels held beer made of rice (*Oryza* sp.), Job's tears (*Coix lacryma-jobi*), and USOs. The findings suggest that beer drinking was an essential element in prehistoric funerary rituals in southern China, contributing to the emergence of complex farming societies four millennia later.

## Archaeological background

The Yangtze River Valley of southern China is the heartland of rice agriculture [14,15]. The transition from foraging to rice farming occurred gradually for about 5,000 years, from the incipient stage of rice cultivation in the early Holocene to the establishment of intensive rice farming in the Liangzhu culture (5,300–4,400 cal. BP) [16–21] (Fig 1). Shangshan was the earliest Neolithic culture in the region, capturing the onset of rice domestication and sedentism [16,17,20,22]. Recent archaeological investigations have discovered 18 Shangshan culture sites in the Jinqu Basin. In the early phase (10,000–9,000 cal. BP), settlements were relatively small villages of up to 3 ha, characterized by simple houses and pit structures. After 9,000 cal. BP, several large (size > 10 ha), ditch-enclosed settlements emerged; these sites had multi-unit dwellings, permanent storage facilities, burials, and ditches [23]. Four sites have been or are being excavated systematically, including three residential settlements, Shangshan (10,000–8,200 cal. BP), Hehuashan (9,000–8,200 cal. BP), Xiaohuangshan (ca. 9,000 cal. BP), and a non-habitation site, Qiaotou (9,000–8,700 cal. BP).

Ongoing excavations at Qiaotou have revealed a platform mound (Fig 2). The mound, measuring 80 x 50 m, has an elevated surface about 3 m above ground level. It is encircled by an ancient river channel and a human-made ditch (Fig 2E), creating an enclosed compound. The ditch may have been constructed with substantial labor, measuring 10–15 m in width and 1.5–2 m in depth (Fig 2J). Two human skeletons, buried in a flexed position oriented to the east, have been found in the northern part of the platform (Fig 2A and 2B). The burials are closely associated with multiple pottery pits, some containing dense concentrations of high-quality, complete pottery vessels (Fig 2C–2F). The eastern part of the platform includes a group of postholes with stone pillar bases, which seem to be remnants of an architectural foundation (Fig 2G–2I). The artifacts recovered from the platform are dominated by elaborate pottery vessels, whereas tools associated with daily activities, such as grinding stones and harvesting implements, are relatively rare. As the current data show, the mound was likely a ritual structure rather than a residential place.

More importantly, the pottery vessels at Qiaotou represent the earliest known painted pottery in the world [24] (Fig 3). They are slip-painted, some decorated with abstract patterns. Based on their typological characteristics, we suspect some vessels may have been alcohol containers. These vessels have narrow necks and globular bodies, akin to the bronze *hu* flask forms during the Shang and Zhou periods, a vessel type known for holding alcohol [25]. The close association between pottery pits and human burials suggests that the mound was a ceremonial place for funerary rituals involving alcohol drinking. To test this hypothesis, we analyzed 20 pots from the site.

## Materials and methods

The pottery assemblage consists of seven long-necked *hu* pots, four bowls, and nine jars. The long-necked *hu* pots are distinctive by their narrow necks, globular bodies, and slightly flaring and folded rims (Fig 3A and 3B). Bowls are flat-bottomed pots with vertical walls, some

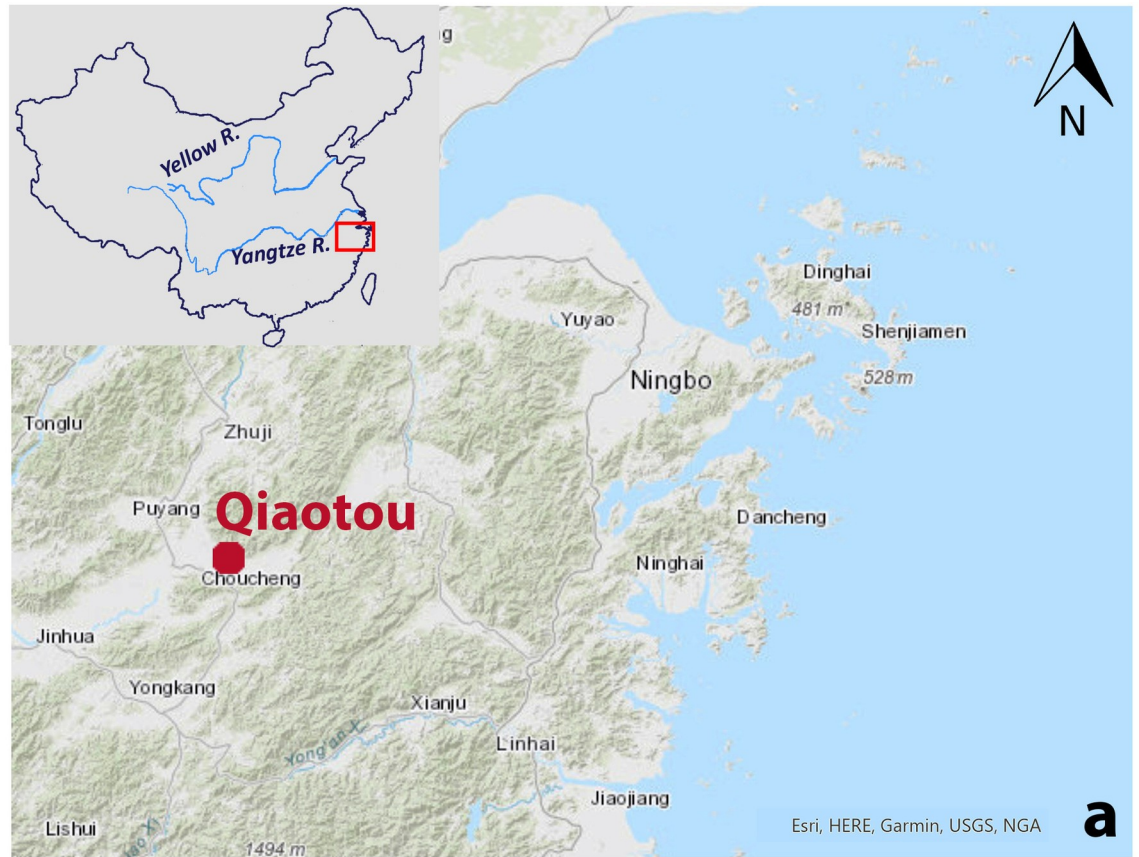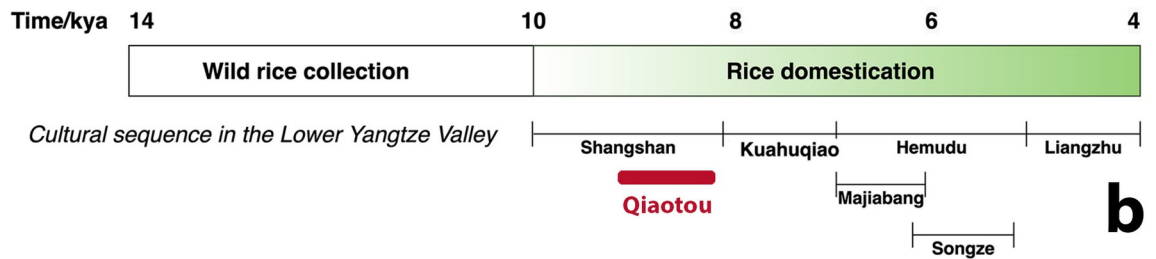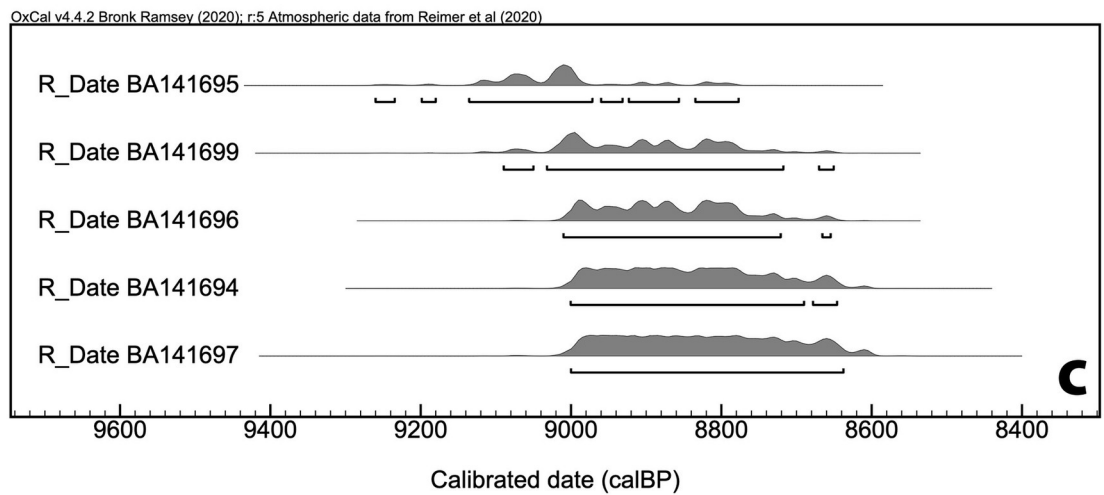

**Fig 1. Archaeological information of the Qiaotou site.** (a) Location of Qiaotou, base map modified from USGS National Map Viewer (<http://viewer.nationalmap.gov/viewer/>); (b) Cultural history and rice domestication in the Lower Yangtze Valley; (c) Calibrated  $2\sigma$  probability distribution of AMS Radiocarbon dates on wood charcoal from Qiaotou (Peking University AMS Laboratory, calibrated by Oxcal v 4.42).

<https://doi.org/10.1371/journal.pone.0255833.g001>

adorned with horizontal lugs and impressed decorations (Fig 3C). Jars are deep-bellied pots with flat or rounded bases (Fig 3D). All the vessels are slip-painted, with some having white dots and line decorations on their external surfaces (Fig 3E).

The vessels were unwashed and taken directly from the ongoing excavation for analysis. We extracted and analyzed three types of microfossil residues (starch, phytolith, and fungi) from interior surfaces using protocols established in the Stanford Archaeology Center (S1 Text, Methods). To rule out the potential contamination from the enclosing soil matrix, we collected seven control samples from the vessels' exterior surfaces. Starch and phytolith identification relied on a reference collection from over 1,100 Asian economically important plant specimens and a database of fermented starch generated by our brewing experiments [26]. Fungal particles were identified according to our microbial database at Stanford and published sourcebooks [27,28]. No permits were required for the described study, which complied with all relevant regulations.

In general, beer making involves two phases: 1) saccharification, during which enzymes break down starches into fermentable sugars; 2) fermentation, during which yeasts convert sugars into alcohol and carbon dioxide. The process sometimes left diagnostic archaeological evidence, in the forms of charred cereal malts [29–31], various biomarkers [11,32,33], and modified starch residues [34]. Preservation of charred malts and biomarkers usually relies on a favorable depositional environment. Microfossils such as starch granules, on the other hand, can preserve well within the pores and cracks of ceramic artifacts. We have recently developed a methodology to identify cereal-based fermentation based on microfossil analysis [26,35]. Prehistoric brews are likely akin to a porridge that contains insoluble materials, including starches and other plant additives not fully digested during the brewing process [36,37]. These residual materials are useful for identifying alcohol-related artifacts. If a pot has been in contact with cereal-based alcohol, we would expect to find two types of microscopically observable elements. The first is starch granules showing modifications from heating and enzymatic hydrolysis during the brewing process. The second includes saccharification and fermentation agents or their sources, such as cereal malts, typical molds from fermentation starters (e.g., *Aspergillus*, *Rhizopus*, and *Mucor*), herbal plants, and yeasts. This combination of botanical and microbial elements does not exist in artifacts unrelated to alcohol or natural soils. In addition, phytoliths from cereal husks and/or herbal plants also provide information for identifying fermentation-related ingredients [12].

In our analysis of Qiaotou pottery, we applied the Congo red staining method to aid the detection of gelatinized starch [38]. After heating, starch granules absorb water and lose their regular and compact chain arrangement, allowing Congo Red to react with their amylose content. Gelatinized starch granules are stained red in bright field light, with an orange-red glow in polarized light. Unmodified starch granules do not take up the stain. Therefore, Congo Red staining is a reliable method for differentiating cooked, gelatinized starch from raw, unmodified starch.

## Results

A total of 170 starch granules or compounds were recovered from Qiaotou pottery (Table 1). Of these, 95 starch granules were identifiable to various taxonomic levels when compared with

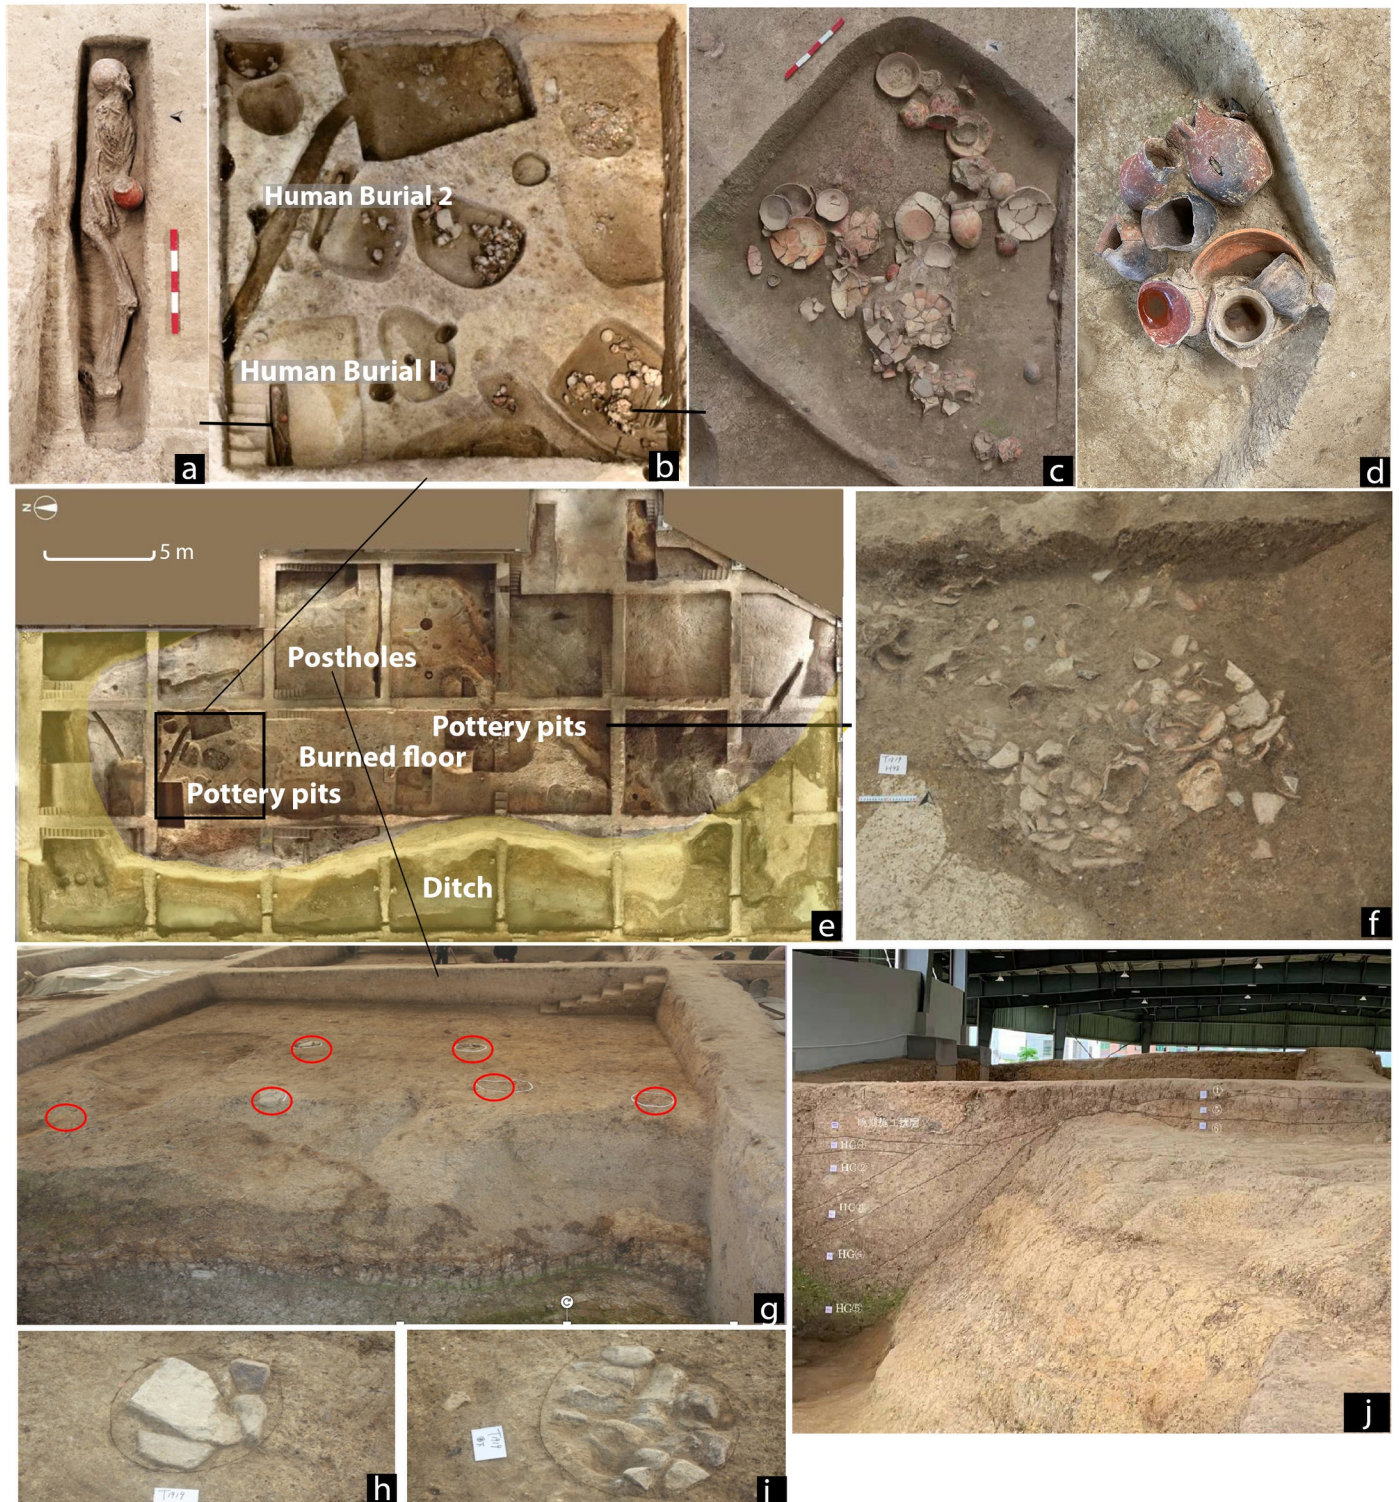

**Fig 2. Archaeological features from Qiaotou platform mound.** (a) Human burial 1 (M44); (b) The locations of human burials and associated pottery pits; (c) and (d) Painted pottery vessels suitable for serving foods and drinks; (e) A bird view photograph showing the location of the platform in relation to the ditch; (f) Pit H98 during excavation, which contained 50 complete pots; (g) A group of postholes from the eastern side of the platform; (h) and (i) Postholes with stone pillar bases; (j) The ditch (left) and platform (right) at Qiaotou.

<https://doi.org/10.1371/journal.pone.0255833.g002>

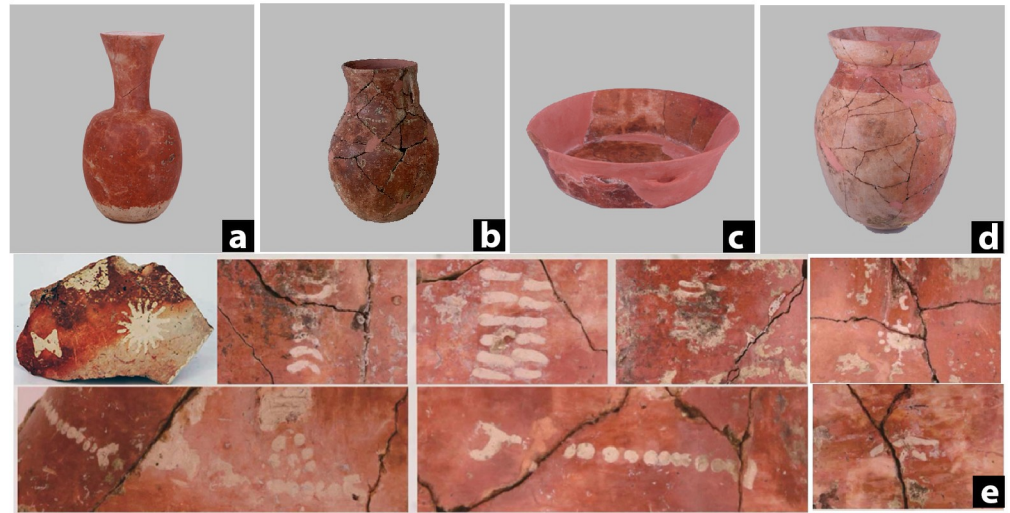

**Fig 3. Representative pottery types recovered from Qiaotou.** (a) and (b) Long-necked *hu* vessel; (c) Bowl; (d) Jar; (e) A selection of painted patterns from Qiaotou pottery.

<https://doi.org/10.1371/journal.pone.0255833.g003>

our reference data. Most unidentified starch granules are gelatinized and characterized by swelling, folding, and distortion, indicating that many vessels held cooked starchy foods or drinks. Among the identified starches, rice (*Oryza* sp.) is the most ubiquitous type, followed by Job's tears (*Coix lacryma-jobi*), unidentified underground storage organs (USOs), and acorns (*Quercus* sp.) (Figs 4 and 5).

Type I, rice starches (55% ubiquity;  $n = 31$ ; 2.18–10.67  $\mu\text{m}$ ; Fig 4A), are polyhedral or round polyhedral, with centric hila and “x” shaped extinction crosses. The granules are small and appear in a compound form. Most granules are gelatinized, and their modification patterns match rice starch in our fermentation experiment (see below).

Type II, Job's tears starches (45% ubiquity;  $n = 24$ ; 10.71–22.74 $\mu\text{m}$ ; Fig 5A), are spherical or polyhedral with two or more flat facets and centric hila that normally have T- or linear-shaped fissures. Some granules exhibit diagnostic features, including an eccentricity ratio greater than 1.47 and the presence of a Z-shaped arm on the extinction cross [39].

Type III granules are classified as unidentified underground storage organs (USOs) (45% ubiquity;  $n = 25$ ; Fig 5C and 5D). They are oval, showing extremely eccentric hilum and bright extinction crosses with bent arms. However, they lack the features that would allow for identification at more specific taxonomic levels.

Type IV, acorns starches (30% ubiquity; 10.43–23.59  $\mu\text{m}$ ;  $n = 15$ ; Fig 5E), are mostly triangular with round corners in shape. The fissure is linear and sometimes appears as a deep depression; the arms of extinction crosses are often bent, lamellae are rare, and the hila are either centric or eccentric.

Starch damage patterns provide detailed information permitting differentiation between cooked and raw plant foods. Fifteen pots revealed gelatinized starch granules, indicating that they held cooked foods and drinks. Among these, eight pots revealed microbotanical and microbial residues indicating the presence of fermented beverages. The conclusion is supported by three lines of evidence.

First, rice starch granules from these pots show morphological features consistent with our rice fermentation experiment (see [26] Fig 1 Method C and Table 2 for details). Three types of rice granules are present in Qiaotou pottery: 1) granules that show swelling with hollowed centers (starch damage type 1)(Fig 4C and 4E), resembling a diagnostic modification caused by

Table 1. Starch data from Qiaotou.

| Artifact ID     | Excavation ID             | Artifact type             | Rice compound | Job's tears | UNID USO    | Acorns     | UNID       | Total | Starch damage type 1 (fermentation) | Starch damage type 2 (cooking) | Functional interpretation         |
|-----------------|---------------------------|---------------------------|---------------|-------------|-------------|------------|------------|-------|-------------------------------------|--------------------------------|-----------------------------------|
| QT-POT1         | T1721HG1(9)               | Bowl                      | 1             |             |             | 6          | 8          | 15    |                                     | 6                              | Food serving pot                  |
| QT-POT2         | T1721HG1(9)<br>H89        | Bowl                      |               |             | 1           |            | 3          | 4     |                                     | 4                              | Food serving pot                  |
| QT-POT3         | T1721HG1(9)<br>H89        | Long-necked <i>hu</i> pot | 4             | 3           |             |            | 9          | 16    | 4                                   | 3                              | Alcohol container                 |
| QT-POT4         | T1721HG1(9)<br>H89        | Long-necked <i>hu</i> pot | 3             | 8           |             |            | 11         | 22    | 3                                   | 8                              | Alcohol container                 |
| QT-POT5         | T1721HG1(9)               | Long-necked <i>hu</i> pot | 1             | 1           | 1           |            | 6          | 9     | 1                                   | 1                              | Possible alcohol container        |
| QT-POT6         | T1721HG1(9)               | Bowl                      | 6             | 2           | 6           |            | 5          | 19    | 3                                   | 11                             | Alcohol container                 |
| QT-POT7         | T1721HG1(9)               | Jar                       |               |             | 3           |            |            | 3     |                                     |                                | Undetermined                      |
| QT-POT8         | T1721HG1(9)               | Bowl                      | 2             |             | 1           |            | 7          | 10    | 2                                   | 8                              | Alcohol container                 |
| QT-POT9         | T1819(6)H98               | Jar                       | 1             | 2           |             | 1          | 4          | 8     |                                     |                                | Undetermined                      |
| QT-POT10        | T1819(6)H98               | Jar                       |               |             |             | 4          |            | 4     |                                     | 4                              | Food cooking/serving              |
| QT-POT11        | T1819(6)H98               | Bowl                      |               |             |             |            | 1          | 1     |                                     |                                | Undetermined                      |
| QT-POT12        | T1819(6)H98               | Jar                       | 1             |             | 1           |            |            | 2     |                                     | 1                              | Possible food serving/cooking pot |
| QT-POT13        | T1819(6)H98               | Jar                       |               | 1           |             |            | 1          | 2     |                                     | 1                              | Possible food serving/cooking pot |
| QT-POT14        | T1819(6)H98               | Jar                       |               |             | 4           |            | 5          | 9     |                                     | 5                              | Food serving/cooking pot          |
| QT-POT15        | T1819(6)H98               | Jar                       |               |             |             | 2          |            | 2     |                                     |                                | Undetermined                      |
| QT-POT16        | T1819(6)H98               | Jar                       |               |             |             | 1          | 4          | 5     |                                     | 3                              | Food serving/cooking pot          |
| QT-POT17        | T1819(6)H98               | Jar                       |               |             |             | 1          | 1          | 2     |                                     |                                | Undetermined                      |
| QT-POT18        | T1818(6)                  | Long-necked <i>hu</i> pot | 2             | 1           |             |            | 3          | 6     | 1                                   | 2                              | Alcohol container                 |
| QT-POT19        | T1817(5)H63<br>(2)        | Long-necked <i>hu</i> pot | 3             | 3           | 4           |            | 3          | 13    | 2                                   | 2                              | Alcohol container                 |
| QT-POT20        | T1716HG1(4)               | Long-necked <i>hu</i> pot | 7             | 3           | 4           |            | 4          | 18    | 3                                   | 1                              | Alcohol container                 |
| <b>Counts</b>   |                           |                           | 31            | 24          | 25          | 15         | 75         | 170   | 19                                  | 60                             |                                   |
| <b>Ubiquity</b> |                           |                           | <b>0.55</b>   | <b>0.45</b> | <b>0.45</b> | <b>0.3</b> | <b>0.8</b> |       |                                     |                                |                                   |
| Control 1       | QT-POT11 exterior surface |                           |               |             |             |            |            | 0     |                                     |                                |                                   |
| Control 2       | QT-POT17 exterior surface |                           |               |             |             |            |            | 0     |                                     |                                |                                   |
| Control 3       | QT-POT18 exterior surface |                           |               |             |             |            |            | 0     |                                     |                                |                                   |
| Control 4       | QT-POT20 exterior surface |                           |               |             |             |            |            | 0     |                                     |                                |                                   |
| Control 5       | QT-POT4 exterior surface  |                           |               |             |             |            |            | 0     |                                     |                                |                                   |

(Continued)

Table 1. (Continued)

| Artifact ID | Excavation ID             | Artifact type | Rice compound | Job's tears | UNID USO | Acorns | UNID | Total | Starch damage type 1 (fermentation) | Starch damage type 2 (cooking) | Functional interpretation |
|-------------|---------------------------|---------------|---------------|-------------|----------|--------|------|-------|-------------------------------------|--------------------------------|---------------------------|
| Control 6   | QT-POT8 exterior surface  |               |               |             |          |        |      | 0     |                                     |                                |                           |
| Control 7   | QT-POT19 exterior surface |               |               |             |          |        |      | 0     |                                     |                                |                           |

<https://doi.org/10.1371/journal.pone.0255833.t001>

the combined effects of enzymatic hydrolysis and heating during the brewing process (Fig 4D and 4F); 2) granules that only show gelatinization without missing parts (starch damage type 2; Fig 4G), consistent with the modifications from ordinary cooking, such as steaming (Fig 4H); and 3) unmodified granules resembling native rice starches (Fig 4A and 4B). While the first type represents the most diagnostic damage from fermentation, the latter two types are also present because starch granules within the same population may have varied responses to the same food processing technique. The residue assemblage also includes other larger gelatinized starch granules (Fig 4I and 4J), some of which are likely from Job's tears and tubers because their unmodified starch granules are present in the same residue assemblage.

Second, analyses of fungal particles (Table 2) revealed abundant fermentation-related molds and yeast cells. The molds are morphologically consistent with *Aspergillus* and *Rhizopus* (Fig 6), typical microorganisms used for making rice beer in East and Southeast Asia [40–43]. *Aspergillus* is characterized by the presence of hyaline hyphae, vesicle, and conidiophores that originate from a basal foot cell and terminate in an apical vesicle. *Rhizopus* has a body of branched mycelium composed of stolon, rhizoids, and brown sporangiophores, with a greyish-black and spherical sporangia located at the tips of the sporangiophores [27]. The yeast cells show small protuberances indicative of budding processes (Fig 6E) [44]. About 81% of the fungal elements (N = 205; 25.6/sample) were found in the pots containing fermented starch residues. The presence of specialized molds suggests that a mold starter was used for simultaneous saccharification and fermentation (see discussion and conclusion).

Third, phytolith data (S1 Table, Fig 7) corroborates the starch assemblage, indicating that rice and Job's tears were the brewing ingredients. Three types of rice phytoliths were identified, including double-peak (85% ubiquity, Fig 7A), *Oryza*-type bulliform (15% ubiquity, Fig 7C), and scooped parallel bilobate (30% uniqueness, Fig 7D). Cross phytoliths (50% ubiquity, Fig 7E) show a considerable variation in form and size, some larger than 18µm in width, which are most comparable to the large Variant 1 cross from glume or utricle of Job's tears [45]. Other common Poaceae family morphotypes include elongate skeletons (Fig 7B–7H), rondel (Fig 7F), and articulated quadrilobate (Fig 7G). The grass phytoliths may come from the cereal ingredients or the husks and leaves intentionally added to the brew to facilitate the fermentation process.

We used the Mann-Whitney test to compare the starch, phytolith, and fungi counts in residue samples with control samples. The results indicate that there is a statistical significance between the two datasets (p-values < 0.05). Overall, the control samples yielded significantly lower amounts of microfossils than residue samples (Fig 8), supporting the claim that the presence of microfossil residues is the result of cultural practices associated with artifacts and rather than natural processes or contamination. In particular, the quantities of yeasts and molds are relatively small in the control samples and pots unrelated to fermentation (2.6/sample), a result in clear contrast to their abundance in fermentation-related pots (25.6/sample). This pattern indicates that most of the fungal particles in Qiaotou pottery were part of a



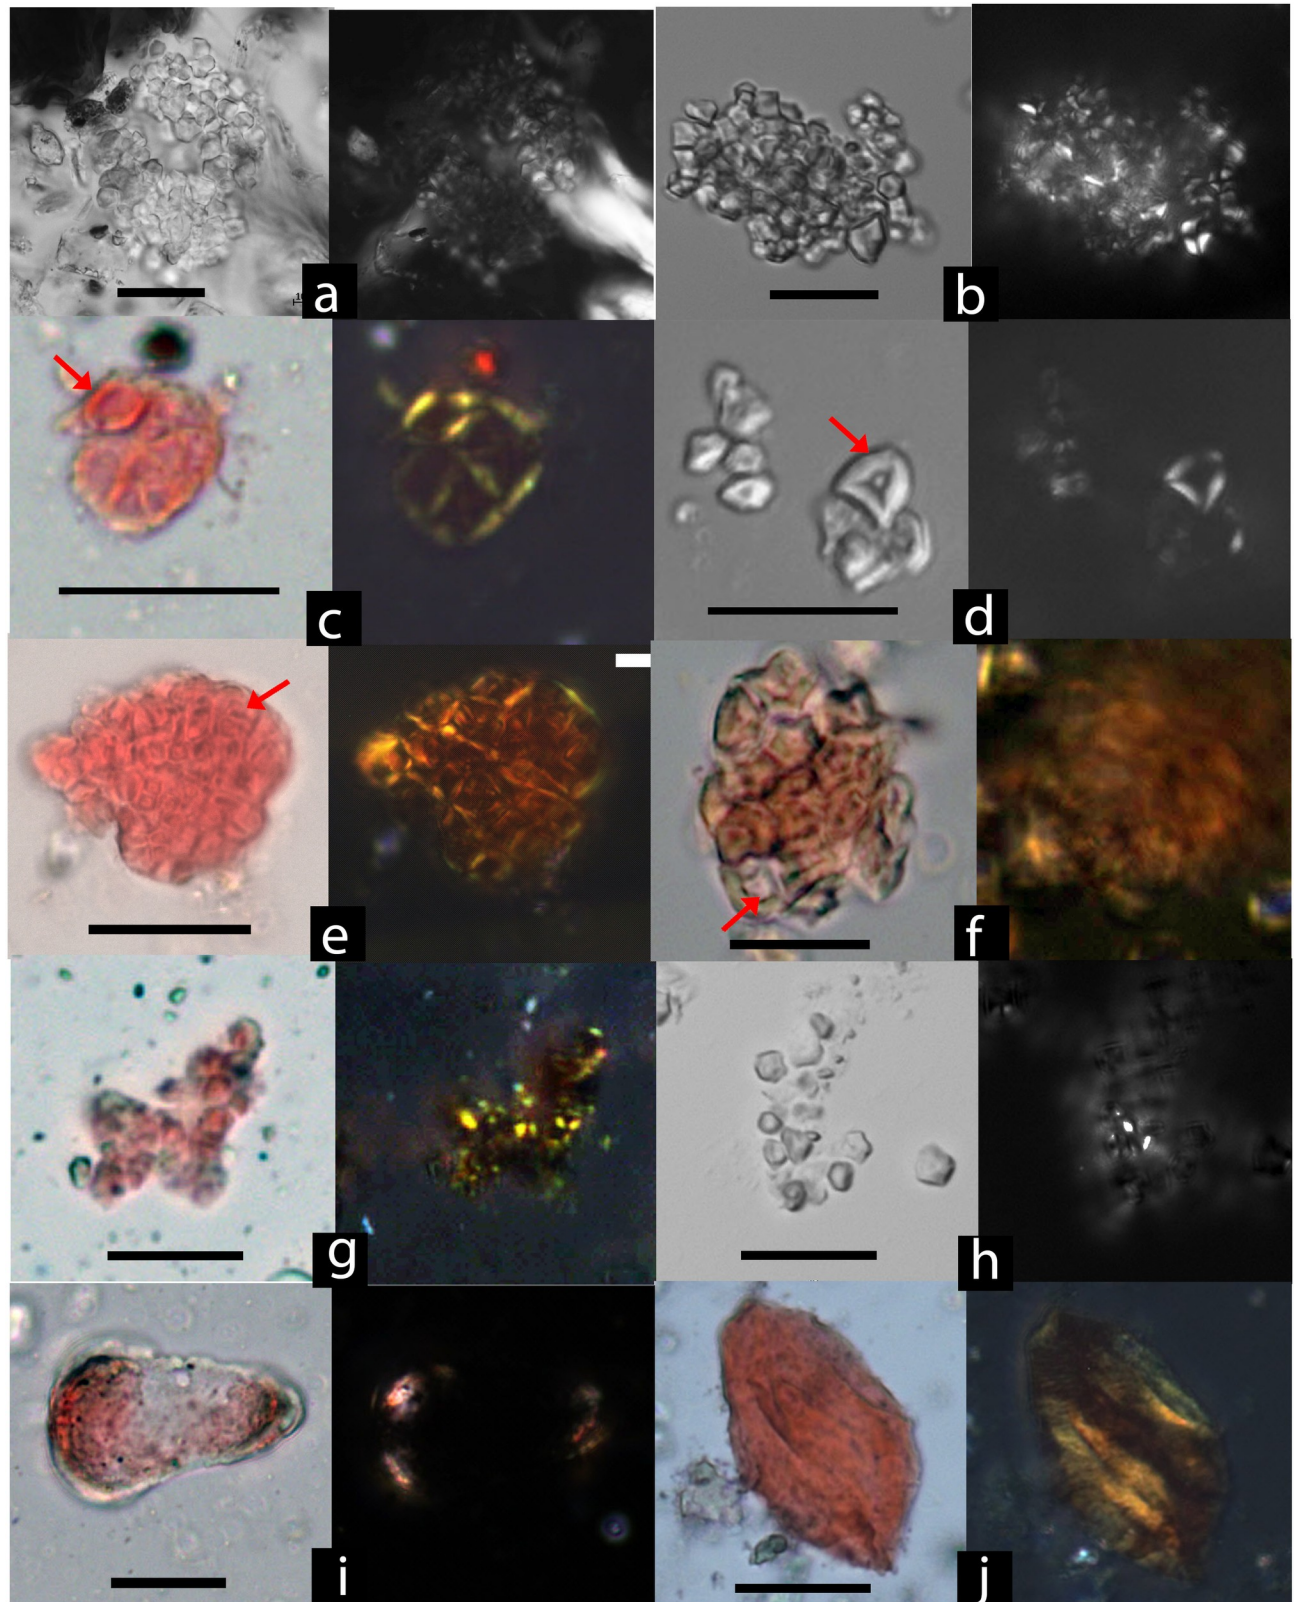

**Fig 4. Starch granules from Qiaotou pots compared with rice brewing experiment samples.** Qiaotou samples: (a) Qiaotou Type I starch (rice), compared with (b); (c) and (e) Compound rice starch granules showing central pitting (pointed by red arrows) and gelatinization (starch damage type 1),

compared with (d) and (f); (g) Slightly gelatinized rice granules without pitting (starch damage type 2), compared with (h); (i) A gelatinized starch granule from Qiaotou, possibly from a USO (starch damage type 2); (j) A gelatinized starch granule from Qiaotou (starch damage type 2). Rice fermentation experiment samples: (b) A cluster of unmodified rice (*Oryza sativa*) starch granules; (c) and (f) Compound rice starch granules showing central pitting (pointed by red arrows) and gelatinization, a result of the combined effects of heating and enzymatic hydrolysis during the fermentation process; (h) Slightly gelatinized rice starch granules, showing faint extinction crosses under polarized light. Starch granules in c, e, f, h, i, and j are stained with Congo Red. They are stained red under in bright field light, with an orange-red glow in polarized light, indicating gelatinization. Each starch granule/compound is shown in bright field and polarized views (scale bars: 20  $\mu\text{m}$ ).

<https://doi.org/10.1371/journal.pone.0255833.g004>

targeted inoculation rather than later colonization during the decay of cooked foods. The only exception is POT7, a jar that contains abundant molds and yeasts but only three unmodified starch granules from a USO. Its function thus remains undetermined.

## Discussion and conclusion

### Making rice beer with a mold starter

Prehistoric alcoholic beverages include beer, wine, and mead. Wine and mead are made from fruits, honey, or other substances composed of simple sugars fermentable into alcohol with

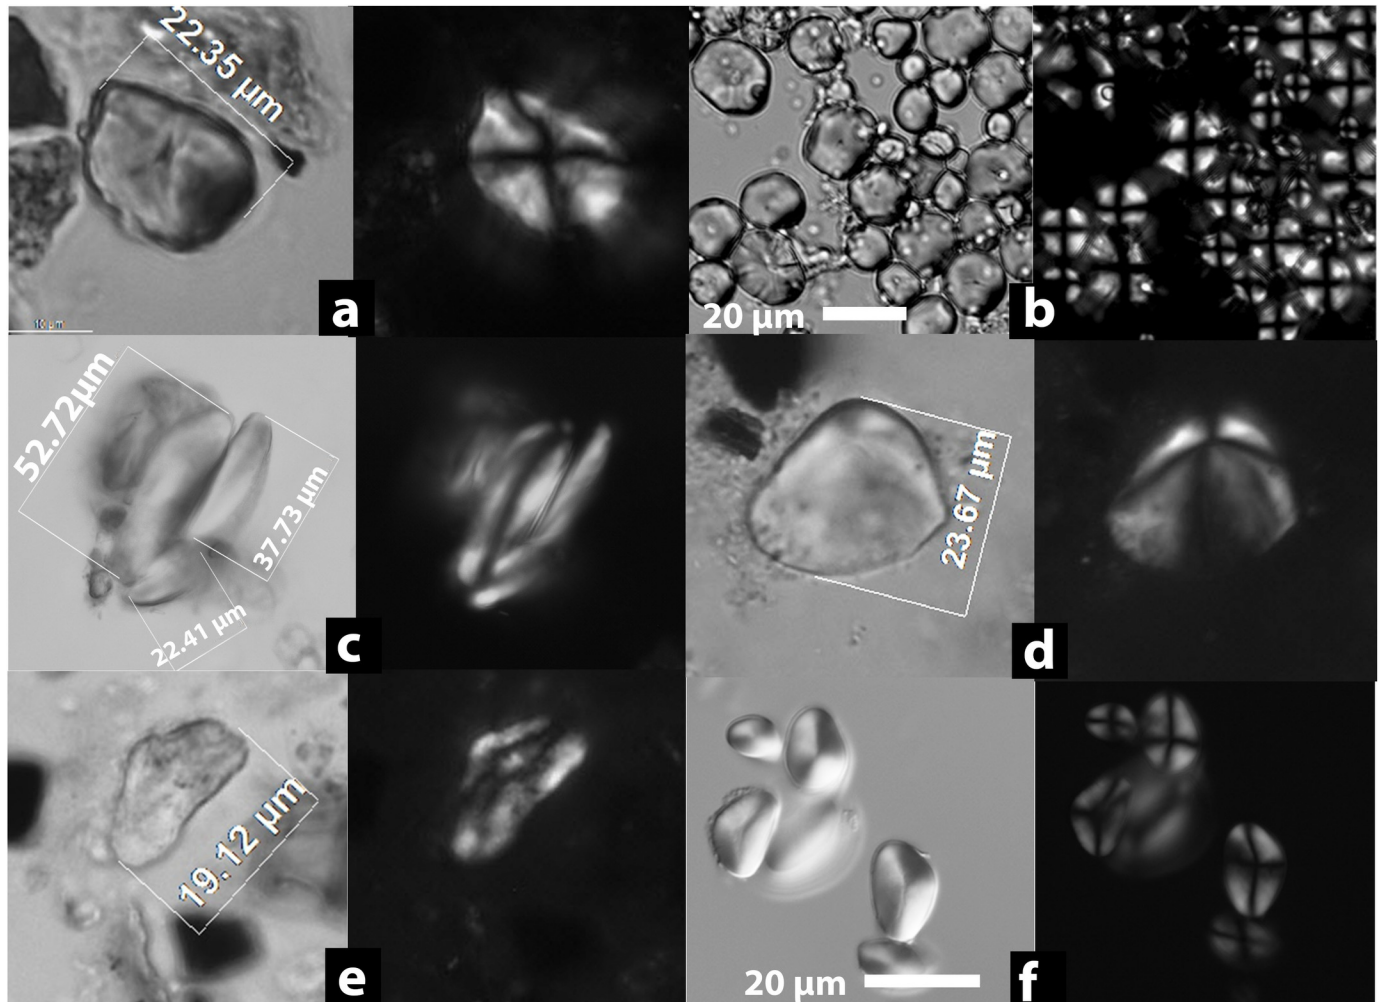

**Fig 5. Starch remains from Qiaotou pottery compared with modern references.** (a) Qiaotou Type II starch (Job's tears); (b) Job's tears (*Coix lacryma-jobi*, from Yunnan); (c) and (d) Qiaotou Type III starch (Unidentified USOs); (e) Qiaotou Type IV starch (acorn); (f) Acorn (*Quercus fabri*, from Zhejiang). Each starch granule/compound is shown in bright field and polarized views.

<https://doi.org/10.1371/journal.pone.0255833.g005>

Table 2. Fungal elements from Qiaotou pottery and control samples.

| Artifact ID | mold/mold fragment | yeast cells show budding | total |
|-------------|--------------------|--------------------------|-------|
| QT-POT1     | 0                  | 4                        | 4     |
| QT-POT2     | 0                  | 0                        | 0     |
| QT-POT3     | 26                 | 2                        | 28    |
| QT-POT4     | 19                 | 1                        | 20    |
| QT-POT5     | 18                 | 1                        | 19    |
| QT-POT6     | 23                 | 6                        | 29    |
| QT-POT7     | 20                 | 12                       | 32    |
| QT-POT8     | 14                 | 10                       | 24    |
| QT-POT9     | 0                  | 1                        | 1     |
| QT-POT10    | 2                  | 0                        | 2     |
| QT-POT11    | 0                  | 1                        | 1     |
| QT-POT12    | 0                  | 2                        | 2     |
| QT-POT13    | 0                  | 0                        | 0     |
| QT-POT14    | 0                  | 0                        | 0     |
| QT-POT15    | 1                  | 1                        | 2     |
| QT-POT16    | 2                  | 0                        | 2     |
| QT-POT17    | 1                  | 1                        | 2     |
| QT-POT18    | 9                  | 1                        | 10    |
| QT-POT19    | 6                  | 2                        | 8     |
| QT-POT20    | 25                 | 42                       | 67    |
| Control 1   | 0                  | 0                        | 0     |
| Control 2   | 0                  | 0                        | 0     |
| Control 3   | 0                  | 0                        | 0     |
| Control 4   | 0                  | 0                        | 0     |
| Control 5   | 0                  | 0                        | 0     |
| Control 6   | 1                  | 0                        | 1     |
| Control 7   | 1                  | 0                        | 1     |

<https://doi.org/10.1371/journal.pone.0255833.t002>

yeasts. Beer, on the other hand, is made from cereal grains or other starchy substances, such as rice, millet, barley, maize, and tubers. These raw materials contain nonfermentable starches that must be saccharified before fermentation [46]. Our analysis shows that the fermented beverage at Qiaotou was likely a beer made from rice, Job's tears, and tubers. Starch and phytoliths from rice are the most ubiquitous in the beer-related pots (100% ubiquity), suggesting that the beverage was likely a “rice beer”.

According to historical records, beer making in ancient China relied on three saccharification agents: human saliva (mastication), sprouted grains (malts), and mold starters (*qu*) [47]. The mold starter method was first invented in China and later spread into other regions in Asia [48]. For example, the Khmer people in Cambodia made *Rhizopus*-rich starters by mixing rice powder with rice husks and various dried local plants [49,50]. Taiwanese indigenous peoples produced rice and millet alcoholic beverages using starters made of moldy cooked rice grains and different local herbs (e.g., *Asteraceae* and *Chenopodiaceae*) [51,52]. These herbal plants are rich in fungi and yeasts and can significantly increase the microorganism activity during brewing. If a mold starter was used for alcohol fermentation in antiquity, we would expect to find starch granules showing typical damage patterns from enzyme digestion and gelatinization due to brewing, filamentous fungi, yeasts, and grass phytoliths. All of these are indeed present in Qiaotou pottery (Fig 9).

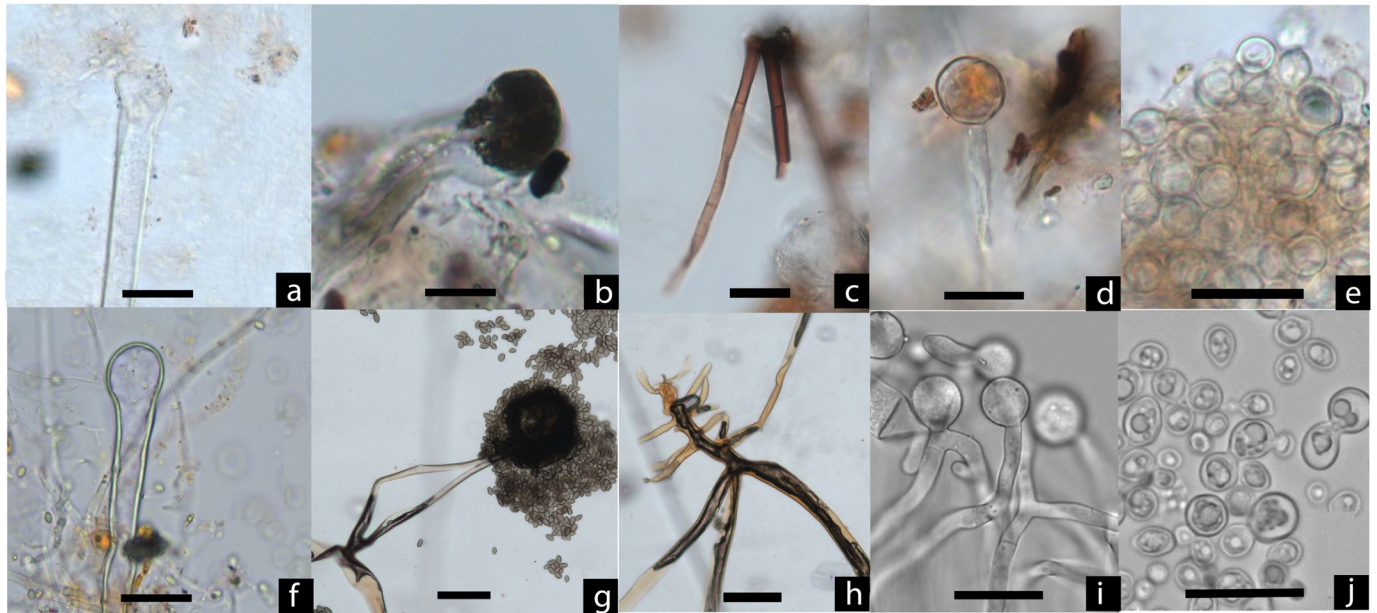

**Fig 6. Molds and yeast cells from Qiaotou pottery compared with modern references.** Qiaotou samples: (a) Vesicle/sporangia without phialides/spores attached, compared with *Aspergillus oryzae* in (f); (b) Black sporangia connecting to sporangiophores, compared with *Rhizopus* in (g); (c) *Rhizopus* sporangiophore, compared with (h); (d) Vesicle/sporangia without phialides/spores attached, compared with *Aspergillus oryzae* in (i); (e) Yeast cells in budding process, compared with (j); Modern samples: (f) *A. oryzae* vesicle; (g) *Rhizopus* rhizoids, sporangiophore, sporangia and sporangiospores; (h) *Rhizopus* rhizoids; (i) *A. oryzae* mycelium; (j) Cultured, domesticated *S. cerevisiae* yeast in various budding forms (scale bars: 20  $\mu$ m).

<https://doi.org/10.1371/journal.pone.0255833.g006>

Our findings provide the earliest evidence for using a *qu* mold starter in beer making, pre-dating written records by at least 8,000 years [47]. The origin of the mold starter method may have been an accidental discovery: when rice grain was left in the open air in a warm and humid environment, it became moldy, producing a concentrate of fungal amylases, yeasts, and bacteria [47]. Without scientific knowledge, people at Qiaotou probably made beer by mixing cooked rice, Job's tears, and tubers; saccharification and fermentation occurred simultaneously through the addition of *qu*, and upon further storage, a fragrant liquor was made. The Qiaotou beer appears to be different from the one discovered at the contemporary site of Jiahu in the Huai River region, which is a mixed fermented beverage made from rice, honey, and fruits [11]. It remains unclear whether honey and/or fruits were added to the brewing ingredients at Qiaotou, and this question may be addressed by chemical analysis in the future.

### The social significance of beer drinking at Qiaotou

Our analysis detected beer residues from six long-necked *hu* vessels and two bowls. The *hu* vessels are small and may have been used as individual drinking containers. The bowls are relatively large and may have been shared within a drinking party, traveling from hand to hand. At Qiaotou, large numbers of the *hu* vessels and bowls ( $N > 20$ ) were found in pits associated with the human burials on the platform. The discard contexts suggest that beer drinking was critical for funerary rituals.

Drinking is essentially a social act embedded with cultural and political significance [53]. The discovery of beer at Qiaotou provides comparative data for the archaeological research of social drinking in other world regions. Previous studies on this topic focused on agricultural and complex societies [3,46,54,55]. For example, research at Cerro Baúl in the Andes shows that molle beer played an essential role in organizing and legitimizing elite activities. By

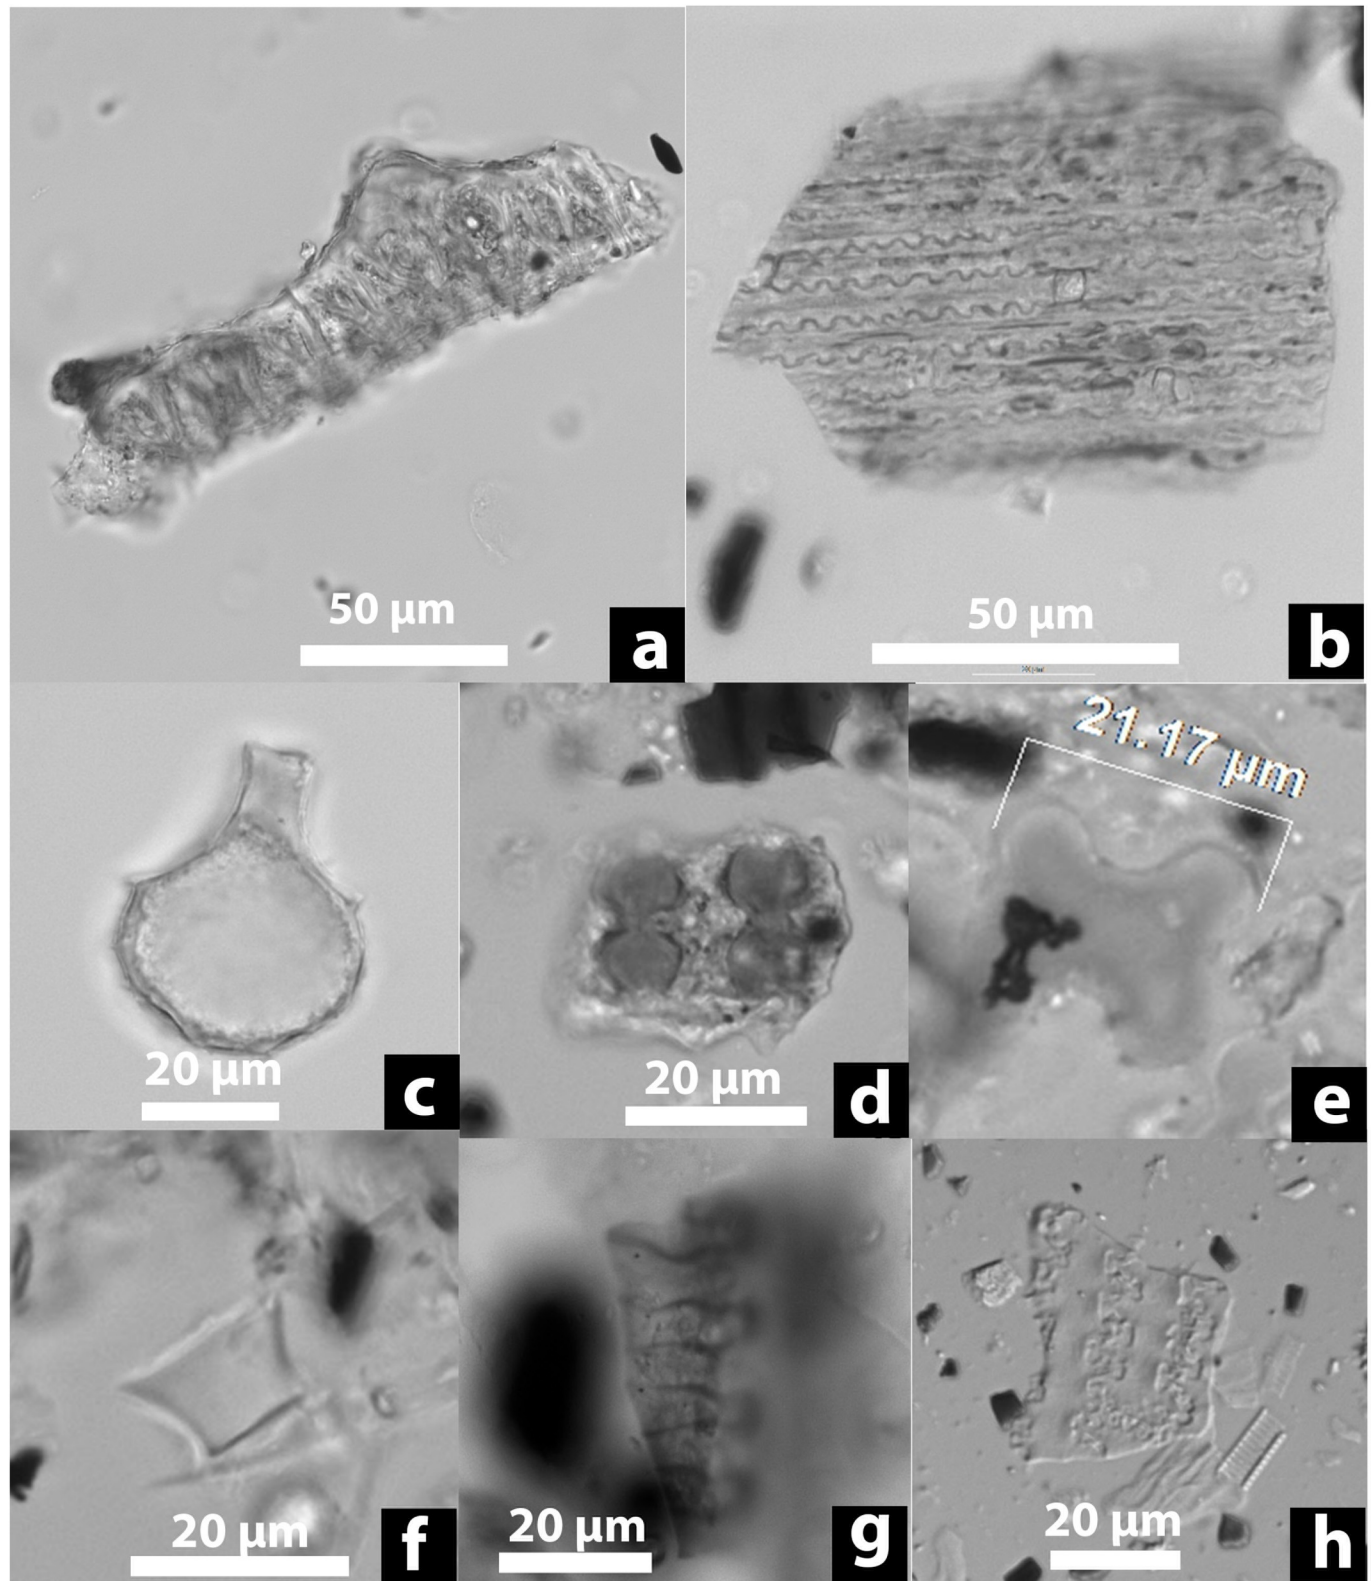

**Fig 7. Phytolith remains from Qiaotou pottery.** (a) Double peak (*Oryza*, rice husk); (b) elongate skeletons (*Poaceae*); (c) *Oryza*-type bulliform (*Oryza*, rice leaf/stem); (d) Parallel scooped bilobate (*Ehrhartoideae*); (f) Cross (cf. Job's tears); (g) Rondel (*Poaceae*); (h) Articulated quadrilobate (*Panicoidae*) (i) Crenate elongate skeleton (cf. *Poaceae* husk).

<https://doi.org/10.1371/journal.pone.0255833.g007>

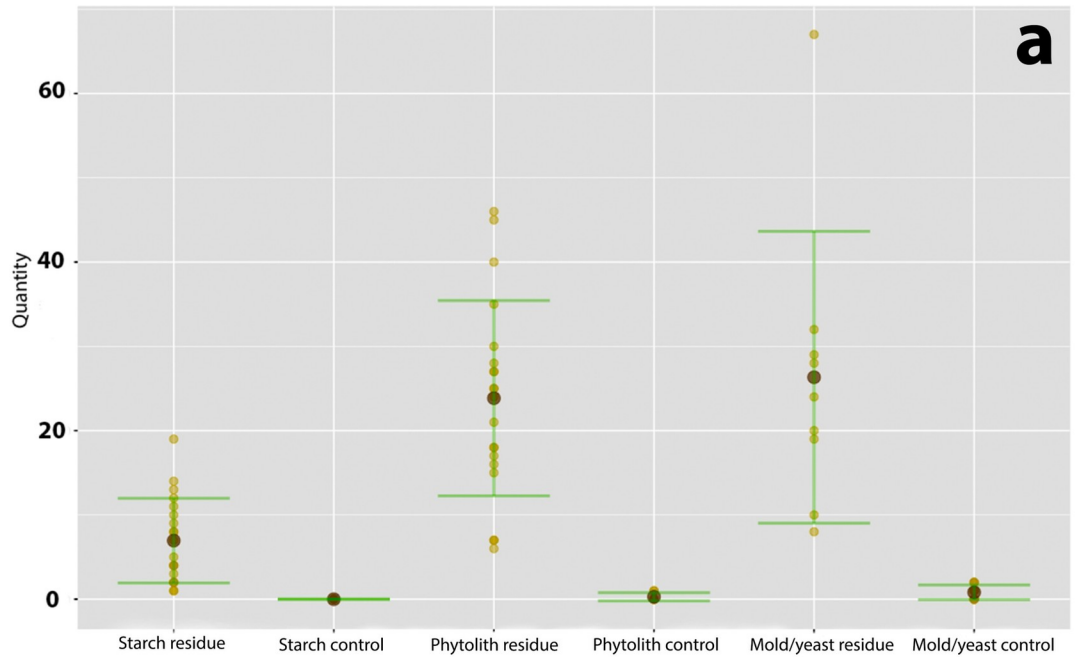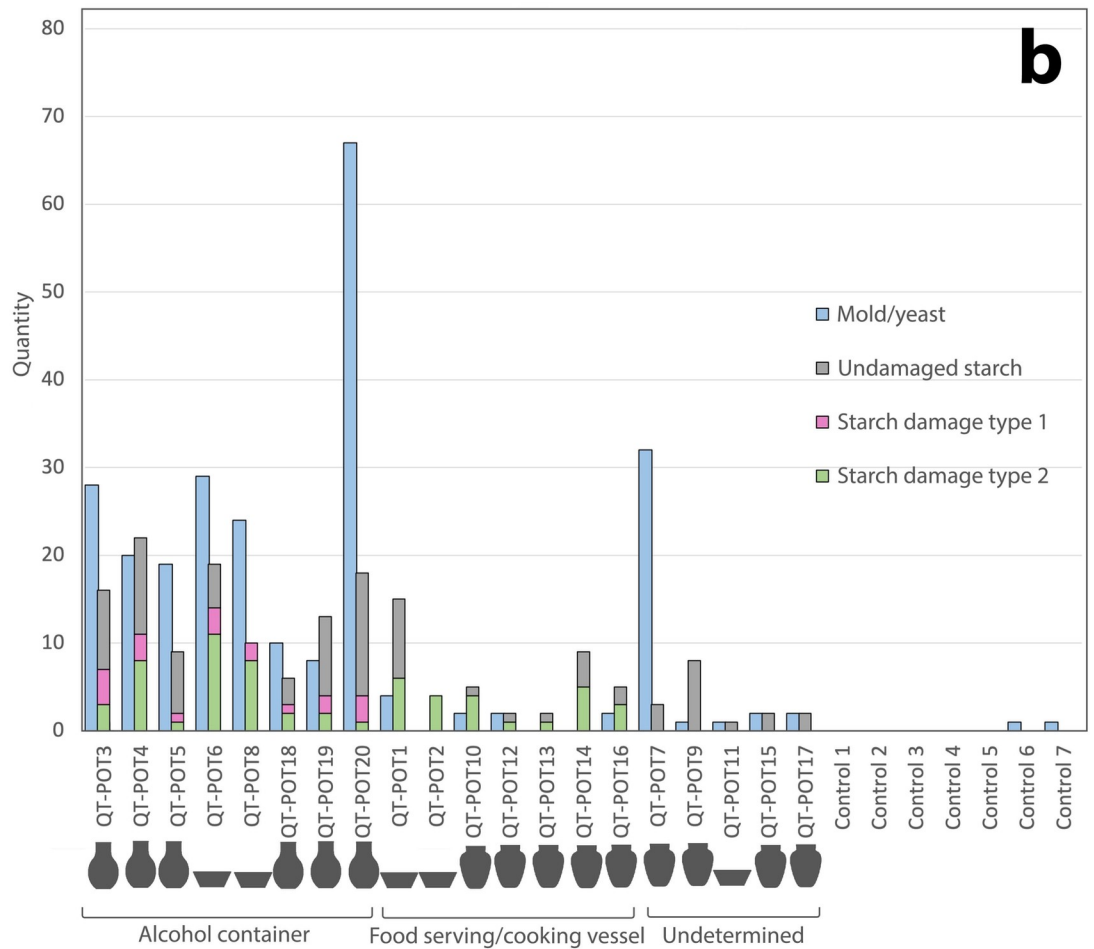

**Fig 8. Quantitative summary of Qiaotou microfossil residue and control samples.** (a) Comparison of microfossil quantities from Qiaotou residue and control samples; (b) Summary of microfossil residues from Qiaotou pottery.

<https://doi.org/10.1371/journal.pone.0255833.g008>

controlling resources for beer brewing, the Wari elites reinforced their identity and consolidated their political power [56–58]. In Chaco Canyon, drinking rituals provided a performative arena for social differentiation and claims to authority, with different forms of drinking vessels signaling social classes, ritual groups, and competitive factions [59]. In these cases, drinking and its associated paraphernalia were essential components of social competition and commensal politics.

Qiaotou adds a new dimension to the discussion by providing an early example of social drinking from a pre-agricultural, egalitarian context. Material remains from Shangshan culture settlements show little evidence of social inequality [23]. Neolithic societies in the Lower Yangtze River remained relatively egalitarian until about 6,000 BP, as indicated by mortuary

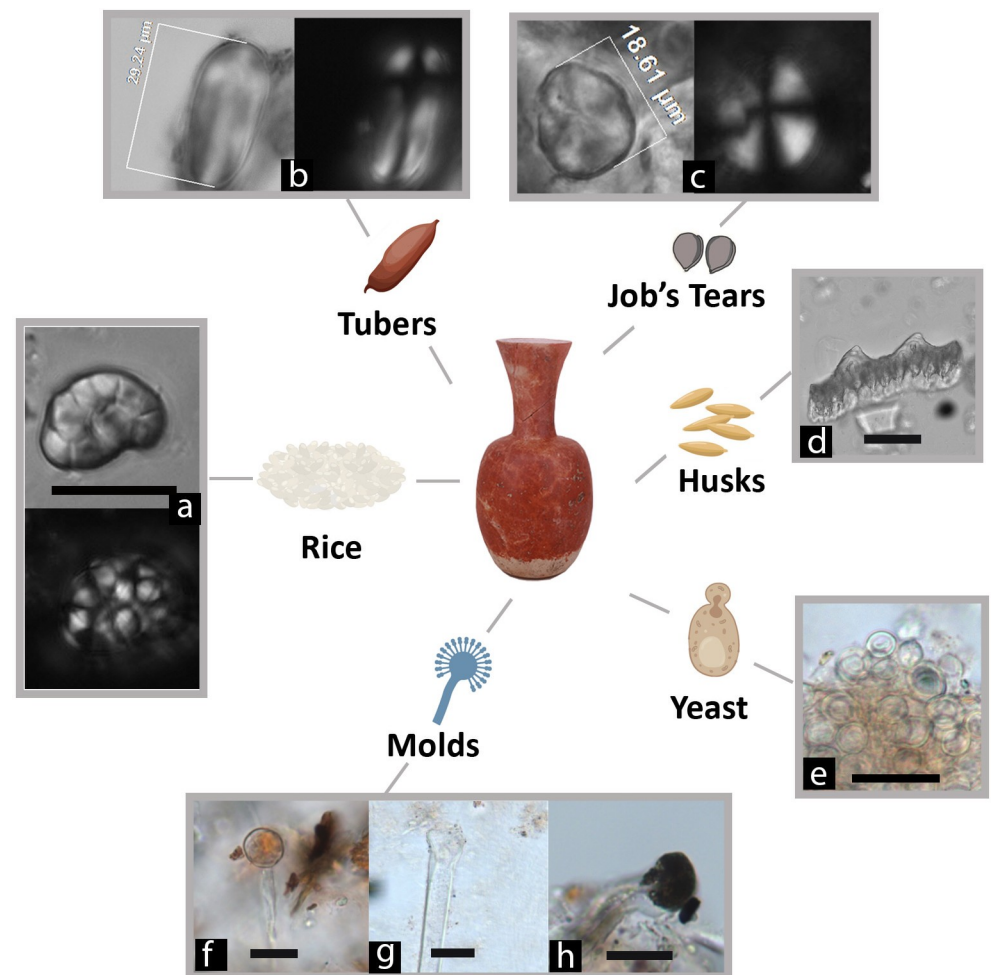

**Fig 9. Beer-related microfossil remains.** (a) Rice starch granules; (b) A starch granule from an unidentified USO; (c) A starch granule from Job's tears, showing a characteristic Z-shaped arm; (d) A double-peak phytolith from rice husk; (e) Yeast cells in budding process; (f) and (g) vesicle/sporangia without phialides/spores attached, compared with *Aspergillus oryzae* in Fig 6; (h) Black sporangia connecting to sporangiophores, compared with *Rhizopus* in Fig 6 (scale bars: 20 μm).

<https://doi.org/10.1371/journal.pone.0255833.g009>

and settlement data [60]. Therefore, beer drinking at Qiaotou was likely associated with other cultural and economic changes during that period. Beginning around 9,000 BP, there was a gradual trend towards more intensified practices of land modification and rice cultivation. Archaeobotanical assemblages from Huxi (9,000–8,400 cal. BP), another ditch-enclosed Shangshan culture site, show evidence of disturbed, well-lit and dry through wetlands, resembling anthropogenic habitats suitable for rice cultivation [16]. This period also witnessed the emergence of several 10 ha “mega-villages” in the region, such as Xiaohuangshan and Huxi, where multi-unit houses, deep storage pits, burials, and ditch enclosures were found together [23,61]. The construction of these settlement structures, together with intensified landscape modifications, would have required a considerable labor force. Beer drinking at Qiaotou was probably not competitive but provided opportunities for fostering social and ideological cohesion among people from different settlements.

For the Shangshan people, beer was likely a “special” or “luxury” food. Previous studies have developed a series of criteria for identifying socially valued foods in the archaeological record [62,63]. These foods are generally rare, exotic, expensive to procure and process, symbolically potent, and valued for their taste or other qualities. The data from Qiaotou fulfill some of the criteria. First, the material remains at Qiaotou suggest that the site was a special and possibly high-status place. Unlike the coarse and mostly undecorated pottery from the residential sites, the vessels at Qiaotou are of high quality, characterized by their fine materials, thin walls, and painted surface decorations. These vessels may have been used exclusively for ritual paraphernalia. Second, the pattern of plant use at Qiaotou is different from that of the earlier and contemporaneous residential sites. Analyses of grinding stones and pottery from Shangshan and Hehuashan suggest that acorns and USOs were the main staple foods, and rice was a minor component in the subsistence economy [64,65]. The ubiquity of rice remains at Qiaotou suggest that it was a luxury crop reserved for special events. Third, like many other fermented beverages, beer is an inebriant with the potential to produce a distinctive suite of physiological and psychological effects [63]. These effects would make beer highly valued and critical for social gatherings [66,67]. Finally, rice harvesting and processing may have been a labor-intensive task. Experimental studies [68,69] show that a prehistoric forager would have to spend more than eight hours on wild rice gathering to obtain adequate daily food. In contrast, collecting other resources, such as shellfish, yam, or bamboo roots, would take only about two to three hours. During the Shangshan period, rice was in the early stage of domestication; its acquisition and production probably involved high labor costs [17,22].

Since the so-called “Braidwood Symposium” in 1953, the consumption of alcoholic beverages has been recognized as a possible driving force in cereal cultivation and the transition to agriculture. The “beer hypothesis,” which was first proposed by Sauer [7] and supported by Katz and Voigt [8], has gained increasing evidence from recent archaeological data. Possible evidence of beer has been identified at the Raqefet cave (13,700–11,700 cal. BP), a Natufian graveyard in Mt. Carmel, Israel, as well as Göbekli Tepe in southeastern Turkey, a monumental sanctuary erected by hunter-gatherer groups [5,6,70]. The discovery of rice beer at Qiaotou provided supporting evidence for the “beer hypothesis.” It is important to note that, however, rice domestication had been ongoing for about a millennium before Qiaotou was constructed [17,22]. Beer drinking may have been one of many contributing factors in the protracted process of rice domestication. Future research from other Neolithic sites in southern China will elucidate this issue more clearly. Overall, the current data suggest that Qiaotou was an early Neolithic ritual center. Ritualized drinking may have provided incentives for cooperative action in early Neolithic southern China, paving the way for the development of complex rice farming societies that emerged four millennia later.



## Supporting information

**S1 Table. Phytolith data from Qiaotou pottery.**

(PDF)

**S1 Text. Methods.**

(PDF)

## Acknowledgments

We thank Dr Li Liu for helping with sample analysis. We thank staff members from the Yiwu Museum for assisting in the collection of residue samples.

## Author Contributions

**Conceptualization:** Jiajing Wang, Leping Jiang.

**Formal analysis:** Jiajing Wang.

**Funding acquisition:** Jiajing Wang.

**Investigation:** Jiajing Wang.

**Methodology:** Jiajing Wang.

**Project administration:** Leping Jiang, Hanlong Sun.

**Resources:** Leping Jiang, Hanlong Sun.

**Visualization:** Jiajing Wang.

**Writing – original draft:** Jiajing Wang.

**Writing – review & editing:** Jiajing Wang.

## References

1. Dietler M. Alcohol: Anthropological/Archaeological Perspectives. *Annual Review of Anthropology*. 2006; 35(1):229–49.
2. McGovern PE. *Uncorking the Past: The Quest for Wine, Beer, and Other Alcoholic Beverages*. Berkeley: University of California Press; 2009.
3. Joffe AH. Alcohol and social complexity in ancient Western Asia. *Current Anthropology*. 1998; 39(3):297–322.
4. Hayden B, Canuel N, Shense J. What Was Brewing in the Natufian? An Archaeological Assessment of Brewing Technology in the Epipaleolithic. *J Archaeol Method Theory*. 2012; 20(1):102–50.
5. Dietrich O, Heun M, Notroff J, Schmidt K, Zarnkow M. The role of cult and feasting in the emergence of Neolithic communities. New evidence from Göbekli Tepe, south-eastern Turkey. *Antiquity*. 2012; 86(333):674–95.
6. Liu L, Wang J, Rosenberg D, Zhao H, Lengyel G, Nadel D. Fermented beverage and food storage in 13,000 y-old stone mortars at Raqefet Cave, Israel: Investigating Natufian ritual feasting. *Journal of Archaeological Science: Reports*. 2018; 21:783–93.
7. Braidwood RJ, Sauer JD, Helbaek H, Mangelsdorf PC, Cutler HC, Coon CS, et al. Symposium: Did Man Once Live by Beer Alone? *American Anthropologist*. 1953; 55(4):515–26.
8. Katz SH, Voigt MM. Bread and Beer: The Early Use of Cereals in the Human Diet. *Expeditions*. 1986; 28(2):23–34.
9. Bauer BS. Legitimization of the State in Inca Myth and Ritual. *American Anthropologist*. 1996; 98(2):327–37.
10. Cummins T. *Toasts with the Inca: Andean Abstraction and Colonial Images on Quero Vessels*. University of Michigan Press; 2002. 484 p.

11. McGovern PE, Zhang J, Tang J, Zhang Z, Hall GR, Moreau RA, et al. Fermented beverages of pre- and proto-historic China. *PNAS*. 2004; 101(51):17593–8. <https://doi.org/10.1073/pnas.0407921102> PMID: 15590771
12. Liu L, Wang J, Levin MJ, Sinnott-Armstrong N, Zhao H, Zhao Y, et al. The origins of specialized pottery and diverse alcohol fermentation techniques in Early Neolithic China. *PNAS*. 2019;201902668. <https://doi.org/10.1073/pnas.1902668116> PMID: 31160461
13. Wang J, Liu L, Ball T, Yu L, Li Y, Xing F. Revealing a 5,000-y-old beer recipe in China. *PNAS*. 2016; 113(23):6444–8. <https://doi.org/10.1073/pnas.1601465113> PMID: 27217567
14. Molina J, Sikora M, Garud N, Flowers JM, Rubinstein S, Reynolds A, et al. Molecular evidence for a single evolutionary origin of domesticated rice. *Proceedings of the National Academy of Sciences of the United States of America*. 2011; 108(20):8351–6. <https://doi.org/10.1073/pnas.1104686108> PMID: 21536870
15. Gross BL, Zhao Z. Archaeological and genetic insights into the origins of domesticated rice. *PNAS*. 2014; 111(17):6190–7. <https://doi.org/10.1073/pnas.1308942110> PMID: 24753573
16. Zheng Y, Crawford GW, Jiang L, Chen X. Rice Domestication Revealed by Reduced Shattering of Archaeological rice from the Lower Yangtze valley. *Scientific Reports*. 2016; 6:28136. <https://doi.org/10.1038/srep28136> PMID: 27324699
17. Zuo X, Lu H, Jiang L, Zhang J, Yang X, Huan X, et al. Dating rice remains through phytolith carbon-14 study reveals domestication at the beginning of the Holocene. *PNAS*. 2017; 114(25):6486–91. <https://doi.org/10.1073/pnas.1704304114> PMID: 28559349
18. Huan X, Lu H, Wang C, Tang X, Zuo X, Ge Y, et al. Bulliform Phytolith Research in Wild and Domesticated Rice Paddy Soil in South China. *PLoS ONE*. 2015; 10(10):e0141255. <https://doi.org/10.1371/journal.pone.0141255> PMID: 26488583
19. Ma T, Zheng Z, Rolett BV, Lin G, Zhang G, Yue Y. New evidence for Neolithic rice cultivation and Holocene environmental change in the Fuzhou Basin, southeast China. *Veget Hist Archaeobot*. 2016;1–12.
20. Wu Y, Jiang L, Zheng Y, Wang C, Zhao Z. Morphological trend analysis of rice phytolith during the early Neolithic in the Lower Yangtze. *Journal of Archaeological Science*. 2014; 49:326–31.
21. Fuller DQ, Qin L, Zheng Y, Zhao Z, Chen X, Hosoya LA, et al. The domestication process and domestication rate in rice: spikelet bases from the Lower Yangtze. *Science*. 2009; 323(5921):1607–10. <https://doi.org/10.1126/science.1166605> PMID: 19299619
22. Huan X, Lu H, Jiang L, Zuo X, He K, Zhang J. Spatial and temporal pattern of rice domestication during the early Holocene in the lower Yangtze region, China. *The Holocene*. 2021;09596836211019090. <https://doi.org/10.1177/09596836211011652> PMID: 34267424
23. Zhejiang Provincial Institute of Cultural Relics and Archaeology. *Shangshan wenhua: faxian yu jishu (The Shangshan Culture: Discoveries and Narratives)*. Beijing: Cultural Relics Publishing House; 2016.
24. Cooper E. *Ten Thousand Years of Pottery*. University of Pennsylvania Press; 2000.
25. Pearlstein E. *Wine Flask (Hu)*. Art Institute of Chicago Museum Studies. 2009; 35(2):32–93.
26. Wang J, Liu L, Georgescu A, Le VV, Ota MH, Tang S, et al. Identifying ancient beer brewing through starch analysis: A methodology. *Journal of Archaeological Science: Reports*. 2017; 15(2017):150–60.
27. Guy S-G, Summerbell R. *Identifying Fungi: A Clinical Laboratory Handbook*. Belmont, CA: Star Publishing Company; 2011.
28. He G, Jia Y, Ding L. *Shipin Weishengwuxue (Food Microbiology)*. Beijing: China Agricultural University Press; 2016.
29. Stika H-P. Traces of a possible Celtic brewery in Eberdingen-Hochdorf, Kreis Ludwigsburg, southwest Germany. *Veget Hist Archaeobot*. 1996; 5(1–2):81–8.
30. Bouby L, Boissinot P, Marinval P. Never Mind the Bottle. Archaeobotanical Evidence of Beer-brewing in Mediterranean France and the Consumption of Alcoholic Beverages During the 5th Century BC. *Hum Ecol*. 2011; 39(3):351–60.
31. Heiss AG, Azorín MB, Antolín F, Kubiak-Martens L, Marinova E, Arendt EK, et al. Mashers to Mashers, Crust to Crust. Presenting a novel microstructural marker for malting in the archaeological record. *PLOS ONE*. 2020; 15(5):e0231696. <https://doi.org/10.1371/journal.pone.0231696> PMID: 32379784
32. McGovern PE, Glusker DL, Moreau RA, Nuñez A, Beck CW, Simpson E, et al. A funerary feast fit for King Midas. *Nature*. 1999; 402(6764):863–4.
33. Correa-Ascencio M, Robertson IG, Cabrera-Cortés O, Cabrera-Castro R, Evershed RP. Pulque production from fermented agave sap as a dietary supplement in Prehispanic Mesoamerica. *PNAS*. 2014; 111(39):14223–8. <https://doi.org/10.1073/pnas.1408339111> PMID: 25225408

34. Samuel D. Investigation of Ancient Egyptian Baking and Brewing Methods by Correlative Microscopy. *Science*. 1996; 273(5274):488–90. <https://doi.org/10.1126/science.273.5274.488> PMID: 8662535
35. Liu L, Wang J, Liu H. The brewing function of the first amphorae in the Neolithic Yangshao culture, North China. *Archaeol Anthropol Sci*. 2020 May 29; 12(6):118.
36. Geller JR. Predynastic beer production at Hierakonpolis, Upper Egypt: Archaeological evidence and anthropological implications, PhD dissertation: Washington University in St. Louis; 1992.
37. Samuel D. Archaeology of ancient Egyptian beer. *Journal of the American Society of Brewing Chemists*. 1996;(54):3–12.
38. Lamb J, Loy T. Seeing red: the use of Congo Red dye to identify cooked and damaged starch grains in archaeological residues. *Journal of archaeological science*. 2005; 32(10):1433–40.
39. Liu L, Ma S, Cui J. Identification of starch granules using a two-step identification method. *Journal of Archaeological Science*. 2014; 52:421–7.
40. Yamamoto S. Ethnic Fermented Foods and Beverages of Cambodia. In: Tamang JP, editor. *Ethnic Fermented Foods and Alcoholic Beverages of Asia*. Springer Nature; 2016. p. 237–62.
41. Jin G, Zhu Y, Xu Y. Mystery behind Chinese liquor fermentation. *Trends in Food Science & Technology*. 2017; 63:18–28.
42. Gou M, Wang H, Yuan H, Zhang W, Tang Y, Kida K. Characterization of the microbial community in three types of fermentation starters used for Chinese liquor production. *Journal of the Institute of Brewing*. 2015; 121(4):620–7.
43. Lee C-H, Lee SS. Cereal fermentation by fungi. In: Khachatourians GG, Arora DK, editors. *Applied Mycology and Biotechnology*. Elsevier; 2002. p. 151–70. (Agriculture and Food Production; vol. 2).
44. Germain GS, Summerbell R. *Identifying Filamentous Fungi: A Clinical Laboratory Handbook*. 1 edition. Belmont, CA: Star Publishing Company; 2011. 314 p.
45. Duncan NA, Starbuck J, Liu L. A method to identify Job's tears, *Coix lacryma-jobi* L., phytoliths in northern China. *Journal of Archaeological Science: Reports*. 2019; 24:16–23.
46. Jennings J, Antrobus KL, Atencio SJ, Glavich E, Johnson R, Loffler G, et al. "Drinking Beer in a Blissful Mood" Alcohol Production, Operational Chains, and Feasting in the Ancient World. *Current Anthropology*. 2005; 46(2):275–303.
47. Huang HT. *Science and Civilisations in China Volume 6: Biology and Biological Technology. Part V: Fermentations and Food Science*. Cambridge: Cambridge University Press; 2000. 769 p.
48. Tamang JP, editor. *Ethnic Fermented Foods and Alcoholic Beverages of Asia*. Springer Nature; 2016.
49. Yamamoto S, Matumoto T. Rice Fermentation Starters in Cambodia: Cultural Importance and Traditional Methods of Production. *Southeast Asian Studies*. 2011; 49(2):192–213.
50. Kato M, Murayama T, Iino H. Microflora of Cambodian Koji-Cake and Screening of Amylase Producers from Isolates. *Gakuen (Showa Women's University)*. 2006.
51. Ling S-S. *Zhongguo jiu zhi qiyuan (The origins of alcohol in China)*. *Bulletin of the Institute of History and Philology Academia Sinica*. 1958; 29:883–901.
52. Yuasa H. *Segawa Kōkichi Taiwan senjūmin shashinshi (Segawa's illustrated ethnography of indigenous Formosan people. The Bunun)*. Shohan. Tōkyō: hakkōsho Moritani Shōkai; 2009.
53. Douglas M, editor. *Constructive Drinking: Perspectives on Drink from Anthropology*. Cambridge: Cambridge University Press; 1987. 312 p.
54. Jennings J, Bowser BJ. Drink, Power and Society in the Andes: An Introduction. In: Jennings J, Bowser BJ, editors. *Drink, Power, and Society in the Andes*. Gainesville: University Press of Florida; 2009. p. 1–27.
55. Arnold B. 'Drinking the Feast': Alcohol and the Legitimation of Power in Celtic Europe. *Cambridge Archaeological Journal*. 1999; 9(1):71–93.
56. Moseley ME, Nash DJ, Williams PR, deFrance SD, Miranda A, Ruales M. Burning down the brewery: Establishing and evacuating an ancient imperial colony at Cerro Baúl, Peru. *PNAS*. 2005; 102(48):17264–71. <https://doi.org/10.1073/pnas.0508673102> PMID: 16293691
57. Williams PR, J. Nash D, Henkin JM, Armitage RA. Archaeometric Approaches to Defining Sustainable Governance: Wari Brewing Traditions and the Building of Political Relationships in Ancient Peru. *Sustainability*. 2019; 11(8):2333.
58. Goldstein D, Coleman R, Williams P. Reconstructing Middle Horizon (500–1000 C.E.) Social Dynamics through Paleoethnobotanical Interpretations of Fermented Beverage Production and Consumption at Cerro Baúl, Moquegua, Perú. In 2009. p. 133–66.
59. Crown PL. Drinking, performance and politics in Pueblo Bonito, Chaco Canyon. *American Antiquity*. 2018; 83(3):387–406.

60. Liu L, Chen X. *The Archaeology of China: From the Late Paleolithic to the Early Bronze Age*. Cambridge: Cambridge University Press; 2012.
61. Zhejiang Provincial Institute of Cultural Relics and Archaeology. *Pujiang Shangshan*. Beijing: Wenwu chubanshe; 2016. (Archaeological Report of Puyang River Valley; vol. III).
62. Curet LA, Pestle WJ. Identifying high-status foods in the archeological record. *Journal of Anthropological Archaeology*. 2010; 29(4):413–31.
63. van der Veen M. When is food a luxury? *World Archaeology*. 2003 Jan 1; 34(3):405–27.
64. Wang J. *The Origin of Rice Agriculture in the Lower Yangtze Valley, China*. PhD Dissertation: Stanford University; 2019.
65. Liu L, Field J, Weisskopf A, Webb J, Jiang L, Huang H, et al. The exploitation of acorn and rice in early Holocene lower Yangtze River, China. *Acta Anthropologica Sinica*. 2010; 29:317–36.
66. Hastorf CA. Andean luxury foods: special food for the ancestors, deities and the élite. *Antiquity*. 2003; 77(297):545–54.
67. Hayden B. Were luxury foods the first domesticates? Ethnoarchaeological perspectives from Southeast Asia. *World Archaeology*. 2003; 34(3):458–69.
68. Lu TLD. *Daozuo yu shiqian wenhua yannian (Rice agriculture and cultural change in prehistory)*. Beijing: Kexue chubanshe; 2013.
69. Lu TLD. The Occurrence of Cereal Cultivation in China. *Asian Perspectives*. 2006; 45:129–58.
70. Dietrich O, Dietrich L. Rituals and Feasting as Incentives for Cooperative Action at Early Neolithic Göbekli Tepe. In: Hockings Kimberley, Dunbar Robin, editors. *Alcohol and Humans: A Long and Social Affair*. Oxford: Oxford University Press; 2019. p. 93–114
